# Supplementary material
Source: PubMed Central journal article supplement (PMC9233084)
Supplement: NIHMS1809523-supplement-Supplementary_Table_3.pdf [file NIHMS1809523-supplement-Supplementary_Table_3.pdf]

| Reagent                                             | Source                      |
|-----------------------------------------------------|-----------------------------|
| polyclonal anti-OTULIN                              | Cell Signaling Technology   |
| polyclonal anti-OTULIN                              | Abcam                       |
| polyclonal anti-HOIP                                | Abcam                       |
| polyclonal anti-HOIP                                | Proteintech                 |
| monoclonal anti-SHARPIN (Clone 4DP5B)               | Cell Signaling Technology   |
| monoclonal anti-HOIL1 (Clone E-2)                   | Santa Cruz                  |
| polyclonal anti-NEMO                                | Cell Signaling Technology   |
| monoclonal anti-CYLD (Clone E-10)                   | Santa Cruz                  |
| monoclonal anti-Caveolin-1 (Clone D46G3)            | Cell Signaling Technology   |
| monoclonal anti-Caveolin-2 (Clone D4A6)             | Cell Signaling Technology   |
| monoclonal anti-Gelsolin (Clone D9W8Y)              | Cell Signaling Technology   |
| polyclonal anti-ADAM10                              | Cell Signaling Technology   |
| monoclonal anti-FLAG-M2                             | Sigma                       |
| monoclonal anti-beta-actin (Clone 13E5)             | Cell Signaling Technology   |
| monoclonal anti-vinculin (Clone 7F9)                | Santa Cruz                  |
| polyclonal anti-mouse IgG, HRP-linked               | GE Healthcare Life Sciences |
| polyclonal anti-rabbit IgG, HRP-linked              | GE Healthcare Life Sciences |
| monoclonal anti-IKKb (Clone 62AT216)                | Abgent                      |
| monoclonal anti-IkBa (Clone L35A5)                  | Cell Signaling Technology   |
| monoclonal anti-P-IKKa//b (Ser176/180) (Clone 16A6) | Cell Signaling Technology   |
| monoclonal anti-ubiquitin (Clone P4D1)              | Cell Signaling Technology   |
| monoclonal anti-LinUb (Clone LUB9)                  | LifeSensors                 |
| monoclonal anti-K63-Ub (Clone APU3)                 | EMD Millipore               |
| monoclonal anti-Caveolin1 (Clone E249)              | Abcam                       |
| monoclonal anti-Caveolin1 (Clone 2297)              | BD Biosciences              |
| monoclonal anti-ADAM10 (Clone SHM14)                | Biolegend                   |
| monoclonal anti-LinUb (Clone 1F11/3F5/Y102L)        | Genentech                   |
| polyclonal anti-human-IgG-AF555                     | Thermo                      |
| polyclonal-anti-mouse-IgG-AF488                     | Thermo                      |
| polyclonal-anti-rabbit-IgG-AF568                    | Thermo                      |
| Anti-CD45 89Y-conjugated (Clone HI30)               | Fluidigm                    |
| Anti-CD57 113In-conjugated (Clone HCD57)            | BioLegend                   |
| Anti-CD11c 115In-conjugated (Clone Bu15)            | BioLegend                   |
| Anti-CD33 141Pr-conjugated (Clone WM53)             | BioLegend                   |
| Anti-CD19 142Nd-conjugated (Clone HIB19)            | BioLegend                   |
| Anti-CD45RA 143Nd-conjugated (Clone HI100)          | BioLegend                   |
| Anti-CD141 144Nd-conjugated (Clone M80)             | BioLegend                   |
| Anti-CD4 145Nd-conjugated (Clone RPA-T4)            | BioLegend                   |
| Anti-CD8 146Nd-conjugated (Clone RPA-T8)            | BioLegend                   |
| Anti-CD20 147Sm-conjugated (Clone 2H7)              | BioLegend                   |
| Anti-CD16 148Nd-conjugated (Clone 3G8)              | BioLegend                   |
| Anti-CD127 149Sm-conjugated (Clone A019D5)          | Fluidigm                    |
| Anti-CD1c 150Nd-conjugated (Clone L161)             | BioLegend                   |
| Anti-CD123 151Eu-conjugated (Clone 6H6)             | BioLegend                   |

|                                                 |                |
|-------------------------------------------------|----------------|
| Anti-CD66b 152Sm-conjugated (Clone G10F5)       | BioLegend      |
| Anti-PD-1 153Eu-conjugated (Clone EH12.2H7)     | BioLegend      |
| Anti-CD86 154Sm-conjugated (Clone IT2.2)        | BioLegend      |
| Anti-CD27 155Gd-conjugated (Clone O323)         | BioLegend      |
| Anti-CCR5 156Gd-conjugated (Clone J418F1)       | BioLegend      |
| Anti-CD117 158Gd-conjugated (Clone 104D2)       | BioLegend      |
| Anti-CD24 159Tb-conjugated (Clone ML5)          | BioLegend      |
| Anti-CD14 160Gd-conjugated (Clone M5E2)         | BioLegend      |
| Anti-CD56 161Dy-conjugated (Clone B159)         | BD Biosciences |
| Anti-gdTCR 162Dy-conjugated (Clone REA591)      | Miltenyi       |
| Anti-CRTH2 163Dy-conjugated (Clone REA598)      | Milentyi       |
| Anti-CLEC12A 164Dy-conjugated (Clone 50C1)      | BioLegend      |
| Anti-CCR6 165Ho-conjugated (Clone G034E3)       | BioLegend      |
| Anti-CD25 166Er-conjugated (Clone M-A251)       | BioLegend      |
| Anti-CCR7 167Er-conjugated (Clone G043H7)       | BioLegend      |
| Anti-CD3 168Er-conjugated (Clone UCHT1)         | BioLegend      |
| Anti-CX3CR1 169Tm-conjugated (Clone 2A9-1)      | BioLegend      |
| Anti-CD38 170Er-conjugated (Clone HB-7)         | BioLegend      |
| Anti-CD161 171Yb-conjugated (Clone HP-3G10)     | BioLegend      |
| Anti-CD209 172Yb-conjugated (Clone 9E9A8)       | BioLegend      |
| Anti-CXCR3 173Yb-conjugated (Clone REA232)      | Miltenyi       |
| Anti-HLADR 174Yb-conjugated (Clone L243)        | BioLegend      |
| Anti-CCR4 176Yb-conjugated (Clone 205410)       | R&D Systems    |
| Anti-CD11b 208Bi-conjugated (Clone ICRF44)      | Fluidigm       |
| Live/dead 103Rh-conjugated                      | Fluidigm       |
| DNA1 191Ir-conjugated                           | Fluidigm       |
| DNA2 193Ir-conjugated                           | Fluidigm       |
| anti-CD3 V450-conjugated (Clone 17A2)           | BD Biosciences |
| anti-CD56 APC-Cy7-conjugated (Clone HCD56)      | BioLegend      |
| anti-CD14 PE-Cy7-conjugated (Clone M5E2)        | BD Biosciences |
| anti-CD19 FITC-conjugated (Clone HIB19)         | BioLegend      |
| anti-CD19 PerCP-Cy5.5-conjugated (Clone SJ25C1) | BD Biosciences |
| anti-phospho-P65 PE-conjugated (K10-895.12.50)  | BD Biosciences |
| anti-IL-1b FITC-conjugated (Clone AS10)         | BD Biosciences |
| anti-IL-6 APC-conjugated (Clone MP5-20F3)       | BD Biosciences |
| anti-IL-8 APC-conjugated (Clone E8N1)           | BioLegend      |
| anti-TNF AF700-conjugated (Clone MAb11)         | BioLegend      |
| anti-MIP1a PE-conjugated (Clone 11A3)           | BD Biosciences |
| anti-MIP1b FITC-conjugated (Clone D21-1351)     | BD Biosciences |
| anti-ADAM10 APC-conjugated (Clone SHM14)        | BioLegend      |

| Identifier                       | Application                      |
|----------------------------------|----------------------------------|
| Cat# 14127, RRID:AB_2576213      | Western blot                     |
| Cat# ab151117, RRID:AB_2728115   | Western blot                     |
| Cat# ab46322, RRID:AB_945269     | Western blot                     |
| Cat# 16289-1-AP, RRID:AB_2878239 | Western blot                     |
| Cat# 12541, RRID:AB_2797949      | Western blot                     |
| Cat# sc-365523, RRID:AB_10841591 | Western blot                     |
| Cat# 2685, RRID:AB_2124829       | Western blot                     |
| Cat# sc-74435, RRID:AB_1122022   | Western blot                     |
| Cat# 3267, RRID:AB_2275453       | Western blot                     |
| Cat# 8522, RRID:AB_10950491      | Western blot                     |
| Cat# 12953, RRID:AB_2632961      | Western blot                     |
| Cat# 14194, RRID:AB_2798420      | Western blot                     |
| Cat# F3165, RRID:AB_259529       | Western blot                     |
| Cat# 5125, RRID:AB_1903890       | Western blot                     |
| Cat# sc-73614, RRID:AB_1131294   | Western blot                     |
| Cat# NA931, RRID:AB_772210       | Western blot                     |
| Cat# NA934, RRID:AB_772206       | Western blot                     |
| Cat# AM8109a, RRID:AB_2233422    | Western blot                     |
| Cat# 7543, RRID:AB_11129663      | Western blot                     |
| Cat# 2697, RRID:AB_2079382       | Western blot                     |
| Cat# 3936, RRID:AB_331292        | Western blot                     |
| Cat# AB130, RRID:AB_2576211      | Western blot                     |
| Cat# 05-1308, RRID:AB_1587580    | Western blot, Immunofluorescence |
| Cat# ab32577, RRID:AB_725987     | Immunofluorescence               |
| Cat# 610406, RRID:AB_397788      | Immunofluorescence               |
| Cat# 352702, RRID:AB_10897813    | Immunofluorescence               |
|                                  | Immunofluorescence               |
| Cat# A21433, RRID:AB_1500626     | Immunofluorescence               |
| Cat# A11001, RRID:AB_2534069     | Immunofluorescence               |
| Cat# A21069, RRID:AB_141416      | Immunofluorescence               |
| Cat# 3089003B, RRID:AB_2661851   | CyTOF                            |
| Cat# 322302, RRID:AB_2661815     | CyTOF                            |
| Cat# 337202, RRID:AB_1236381     | CyTOF                            |
| Cat# 303410, RRID:AB_2074243     | CyTOF                            |
| Cat# 302202, RRID:AB_2661817     | CyTOF                            |
| Cat# 304102, RRID:AB_314406      | CyTOF                            |
| Cat# 344102, RRID:AB_2661788     | CyTOF                            |
| Cat# 300502, RRID:AB_314070      | CyTOF                            |
| Cat# 301002, RRID:AB_2661818     | CyTOF                            |
| Cat# 302302, RRID:AB_314250      | CyTOF                            |
| Cat# 302014, RRID:AB_314214      | CyTOF                            |
| Cat# 3149011B, RRID:AB_2661792   | CyTOF                            |
| Cat# 331502, RRID:AB_2661820     | CyTOF                            |
| Cat# 306002, RRID:AB_2661822     | CyTOF                            |

|                                   |                |
|-----------------------------------|----------------|
| Cat# 305102, RRID:AB_2661823      | CyTOF          |
| Cat# 329926, RRID:AB_11147365     | CyTOF          |
| Cat# 305410, RRID:AB_314530       | CyTOF          |
| Cat# 302802, RRID:AB_2661825      | CyTOF          |
| Cat# 359102, RRID:AB_2562457      | CyTOF          |
| Cat# 313202, RRID:AB_313202       | CyTOF          |
| Cat# 311102, RRID:AB_314851       | CyTOF          |
| Cat# 301810, RRID:AB_314192       | CyTOF          |
| Cat# 555513, RRID:AB_395903       | CyTOF          |
| Cat# 048-785                      | CyTOF          |
| Cat# 130-122-305, RRID:AB_2801886 | CyTOF          |
| Cat# 353602, RRID:AB_10962440     | CyTOF          |
| Cat# 353402, RRID:AB_10918625     | CyTOF          |
| Cat# 356102, RRID:AB_2661833      | CyTOF          |
| Cat# 353256, RRID:AB_2814291      | CyTOF          |
| Cat# 300402, RRID:AB_2661835      | CyTOF          |
| Cat# 341602, RRID:AB_1595422      | CyTOF          |
| Cat# 356602, RRID:AB_2661836      | CyTOF          |
| Cat# 339902, RRID:AB_2661837      | CyTOF          |
| Cat# 330102, RRID:AB_1134253      | CyTOF          |
| Cat# 130-108-022, RRID:AB_2655743 | CyTOF          |
| Cat# 307602, RRID:AB_314680       | CyTOF          |
| Cat# MAB1567, RRID:AB_2074395     | CyTOF          |
| Cat# 3209003B, RRID:AB_2687654    | CyTOF          |
| Cat# 201103A                      | CyTOF          |
| Cat# 201192A                      | CyTOF          |
| Cat# 201192A                      | CyTOF          |
| Cat# 560366, RRID:AB_1645569      | Flow Cytometry |
| Cat# 318332, RRID:AB_10896424     | Flow Cytometry |
| Cat# 557742, RRID:AB_396848       | Flow Cytometry |
| Cat# 302205, RRID:AB_314235       | Flow Cytometry |
| Cat# 340951, RRID:AB_400192       | Flow Cytometry |
| Cat# 558423, RRID:AB_647222       | Flow Cytometry |
| Cat# 340515, RRID:AB_400438       | Flow Cytometry |
| Cat# 561441, RRID:AB_10679121     | Flow Cytometry |
| Cat# 511410, RRID:AB_893464       | Flow Cytometry |
| Cat# 502928, RRID:AB_2561315      | Flow Cytometry |
| Cat# 554730, RRID:AB_395532       | Flow Cytometry |
| Cat# 560565, RRID:AB_1645489      | Flow Cytometry |
| Cat# 352706, RRID:AB_2563173      | Flow Cytometry |
