# Supplementary material
Source: PubMed Central journal article supplement (PMC9233084)
Supplement: NIHMS1809523-supplement-Supplementary_Table_4.pdf [file NIHMS1809523-supplement-Supplementary_Table_4.pdf]

| <b>Buffer</b>             |
|---------------------------|
| Whole cell lysis buffer A |
| Whole cell lysis buffer B |
| Whole cell lysis buffer C |
| Whole cell lysis buffer D |
| Whole cell lysis buffer E |

**Composition**

50 mM Tris, pH 7.5, 135 mM NaCl, 1 M MgCl<sub>2</sub>, 10% glycerol, 7 M urea, N-ethylmaleimide 10 mM, 1% Triton X-100

50 mM Tris pH 7.5, 150 mM NaCl, 1% NP40, 1 mM EDTA, 0.1% SDS, supplemented with cOmplete Protease Inhibitor

50 mM Tris pH 7.5, 150 mM NaCl, 1% NP40, 1 mM EDTA, supplemented with cOmplete Protease Inhibitor Cocktail

50 mM Tris pH 7.5, 150 mM NaCl, 1% Triton X-100, 1 mM EDTA, supplemented with cOmplete Protease Inhibitor

30 mM Tris pH 7.5, 120 mM NaCl, 2 mM KCl, 2 mM EDTA, 1% NP-40; 5 mM N-ethylmaleimide (NEM), supplemented

| <b>Application</b>                                                                     |
|----------------------------------------------------------------------------------------|
| Linear deubiquitination assays in HEK293T cells                                        |
| Whole cell lysis of HEK293T cells                                                      |
| Whole cell lysis in primary dermal fibroblasts and PBMCs                               |
| Whole cell lysis in immortalized fibroblasts                                           |
| Linear ubiquitin-selective tandem Ub-binding entity assays in immortalized fibroblasts |
